# Supplementary material
Source: publisher figshare collection journal article supplement (https://rs.figshare.com/ndownloader/files/18233423)
Supplement: Supplementary file 1 [file 18233423]

# Overwintering tropical herbivores accelerate detritus production on temperate reefs

Salvador Zarco-Perello<sup>1</sup>, Tim J. Langlois<sup>1</sup>, Thomas Holmes<sup>2</sup>, Mathew A. Vanderklift<sup>3</sup>, Thomas Wernberg<sup>1,4</sup>.

<sup>1</sup> School of Biological Sciences and UWA Oceans Institute, The University of Western Australia, Crawley (Perth), 6009, Western Australia, Australia. <sup>2</sup> Marine Science Program, Department of Biodiversity, Conservation and Attractions, Kensington, WA, Australia. <sup>3</sup> Commonwealth Scientific and Industrial Research Organization (CSIRO), Oceans and Atmosphere Flagship, Indian Ocean Marine Research Centre, Crawley, Western Australia, 6009, Australia. <sup>4</sup> Department of Science and Environment, Roskilde University, 4000 Roskilde, Denmark.

Correspondence and requests for materials should be addressed to S.Z. (email: [salvador.zarco.perello@gmail.com](mailto:salvador.zarco.perello@gmail.com)) or T.W. (email: [thomas.wernberg@uwa.edu.au](mailto:thomas.wernberg@uwa.edu.au))

## Supplementary Information

### Herbivory rates

Table S1. Number of bites, bite rates and standardized consumption rates by bite size of tropical (*Siganus fuscescens* and temperate herbivorous fish (*Kyphosus sydneyanus* and *Olisthops cyanomelas*) on different herbivory categories.

|                             |        | Total herbivory                                                                        | Browsing herbivory                                                                           | Kelp herbivory                                                                               | Drifting herbivory                                                                          |
|-----------------------------|--------|----------------------------------------------------------------------------------------|----------------------------------------------------------------------------------------------|----------------------------------------------------------------------------------------------|---------------------------------------------------------------------------------------------|
| <i>Siganus fuscescens</i>   | Summer | 18092 bites<br>426 bites hr <sup>-1</sup><br>244 ± 65 cm <sup>2</sup> hr <sup>-1</sup> | 16150 bites<br>389 ± 107 bites hr <sup>-1</sup><br>223 ± 64 cm <sup>2</sup> hr <sup>-1</sup> | 13020 bites<br>314 ± 102 bites hr <sup>-1</sup><br>182 ± 62 cm <sup>2</sup> hr <sup>-1</sup> | 1942 bites<br>37.5 ± 12 bites hr <sup>-1</sup><br>21.4 ± 7 cm <sup>2</sup> hr <sup>-1</sup> |
|                             | Winter | 979 bites<br>15.3 bites hr <sup>-1</sup><br>7.4 ± 7.4 cm <sup>2</sup> hr <sup>-1</sup> | 777 bites<br>12 ± 12 bites hr <sup>-1</sup><br>6 ± 5.9 cm <sup>2</sup> hr <sup>-1</sup>      | 757 bites<br>12 ± 12 bites hr <sup>-1</sup><br>5.7 ± 5.6 cm <sup>2</sup> hr <sup>-1</sup>    | 202 bites<br>3.1 ± 3.1 bites hr <sup>-1</sup><br>1.5 ± 1.5 cm <sup>2</sup> hr <sup>-1</sup> |
| <i>Kyphosus Sydneyanus</i>  | Summer | 715 bites<br>21.2 bites hr <sup>-1</sup><br>45.6 ± 22 cm <sup>2</sup> hr <sup>-1</sup> | 628<br>19.7 ± 10.4 bites hr <sup>-1</sup><br>42 ± 22 cm <sup>2</sup> hr <sup>-1</sup>        | 616 bites<br>19.4 ± 10 bites hr <sup>-1</sup><br>41 ± 23.5 cm <sup>2</sup> hr <sup>-1</sup>  | 87 bites<br>1.4 ± 0.8 bites hr <sup>-1</sup><br>3.4 ± 2 cm <sup>2</sup> hr <sup>-1</sup>    |
|                             | Winter | 69 bites<br>1.1 bites hr <sup>-1</sup><br>1.7 ± 1.6 cm <sup>2</sup> hr <sup>-1</sup>   | 69<br>1 ± 1 bites hr <sup>-1</sup><br>1.7 ± 1.6 cm <sup>2</sup> hr <sup>-1</sup>             | 69<br>1 ± 1 bites hr <sup>-1</sup><br>1.7 ± 1.6 cm <sup>2</sup> hr <sup>-1</sup>             | 0                                                                                           |
| <i>Olisthops cyanomelas</i> | Summer | 83 bites<br>1.6 bites hr <sup>-1</sup>                                                 | 83 bites<br>1.6 bites hr <sup>-1</sup>                                                       | 35 bites<br>0.75 bites hr <sup>-1</sup>                                                      | 0                                                                                           |
|                             | Winter | 0                                                                                      | 0                                                                                            | 0                                                                                            | 0                                                                                           |

## Herbivorous fish body and bite sizes

On average rabbitfish were 60% smaller than temperate silver drummer. Rabbitfish average fork length was  $28.5 \pm 1.5$  cm, with a minimum observed size of 20.5 cm and a maximum of 38.5 cm, while silver drummer average length was  $43.2 \pm 9.1$  cm, with a minimum size of 18 cm and a maximum of 72.5 cm. Bite size of both species followed a power relationship with weight but silver drummers had larger bite area than rabbitfish by 3 times within their comparable weight range (*i.e.* 200-400 g) and 6 times larger at bigger sizes ( $\sim 7300$  g) (Fig. S1).

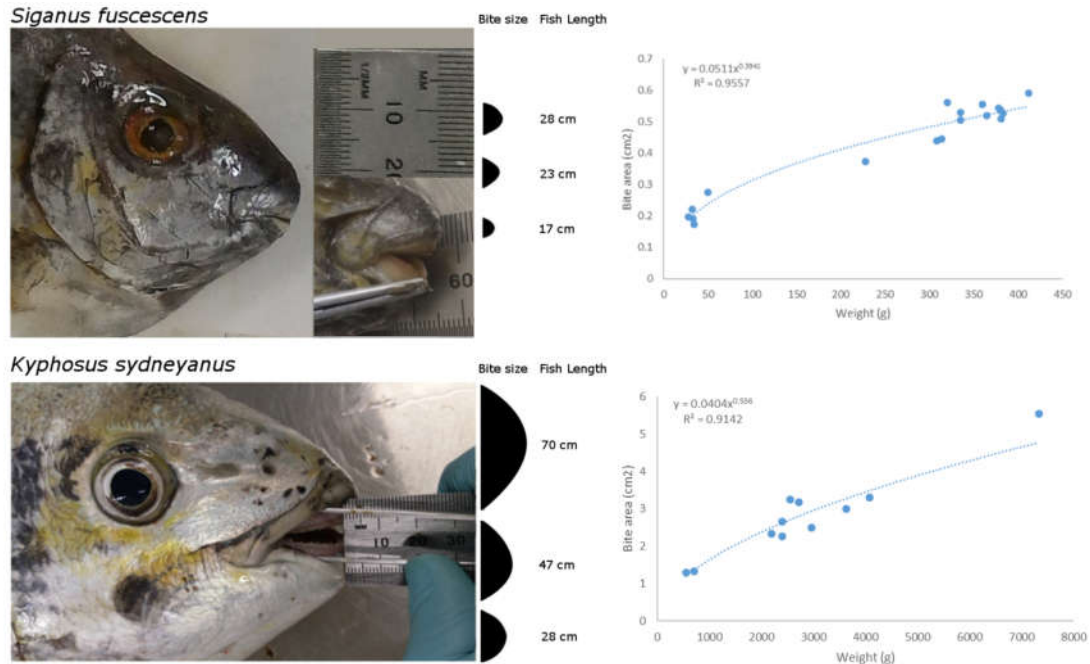

Figure S1. Dentition photographs, bite size per fish length diagrams and bite area per fish weight relationships of the tropical *Siganus fuscescens* and the temperate herbivore *Kyphosus sydneyanus*.

## Recruitment of Rabbitfish in Temperate Western Australia

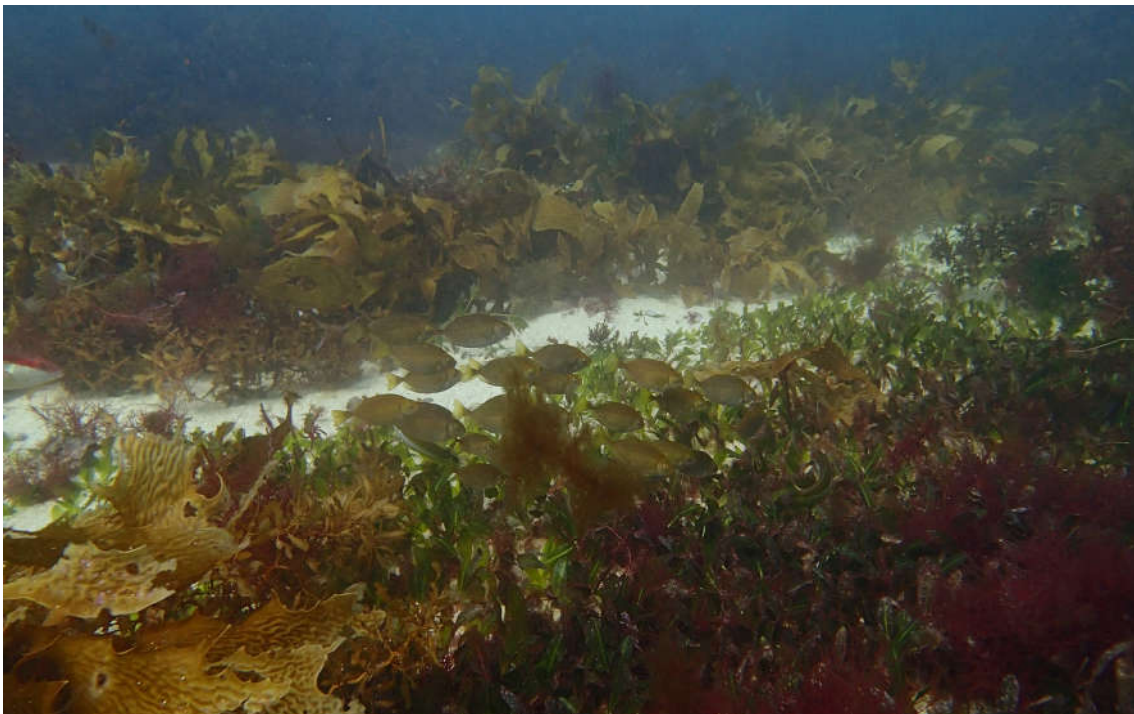

Figure S2. School of juvenile *Siganus fuscescens* in a temperate reef of Western Australia during summer of 2016.
